# Supplementary material for: Synthesis, Characterisation, and Evaluation of a Cross-Linked Disulphide Amide-Anhydride-Containing Polymer Based on Cysteine for Colonic Drug Delivery
Source: Int J Mol Sci. 2013 Dec 18;14(12):24670–91. doi: 10.3390/ijms141224670 (PMC3876135; doi:10.3390/ijms141224670)

## Supplementary Information

**Figure S1.**  $^1\text{H}$ -NMR spectrum of compound **1**.

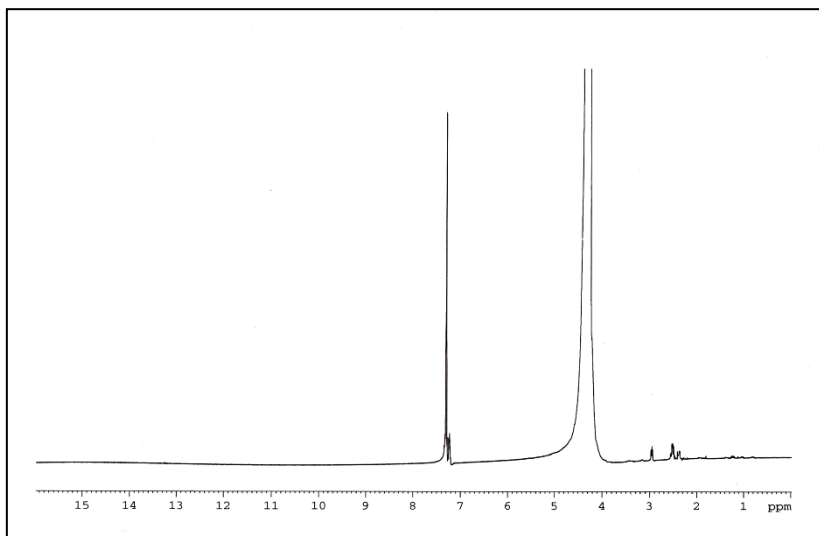

**Figure S2.**  $^1\text{H}$ -NMR spectrum of compound **2**.

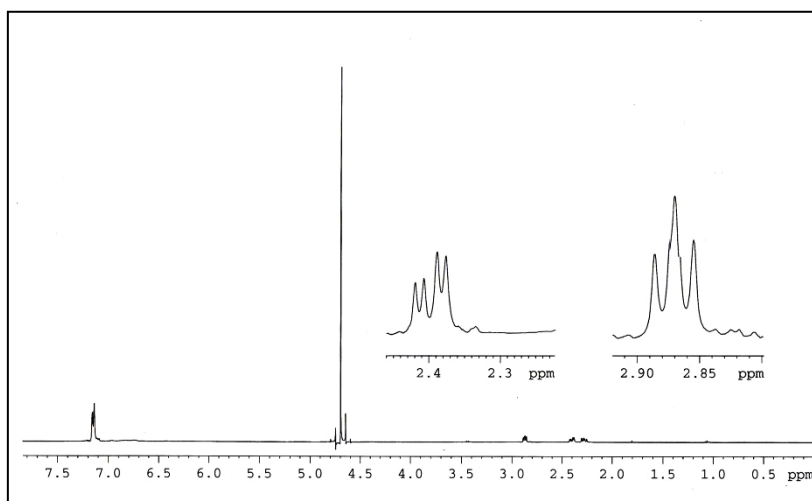

**Figure S3.**  $^1\text{H}$ -NMR spectrum of compound **3**.

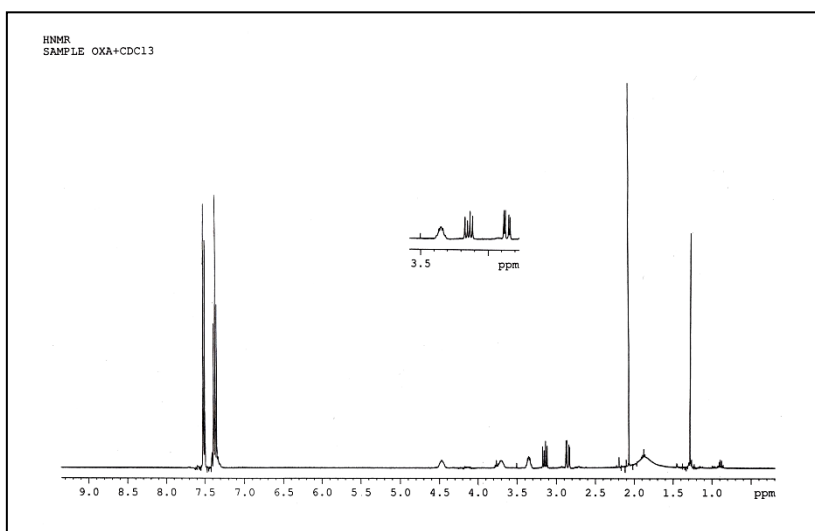

**Figure S4.**  $^1\text{H}$ -NMR spectrum of compound **4**.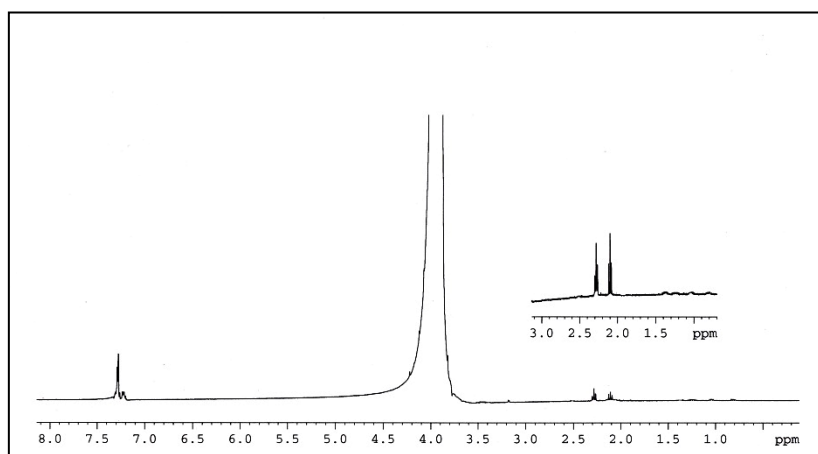**Figure S5.**  $^1\text{H}$ -NMR spectrum of compound **5**.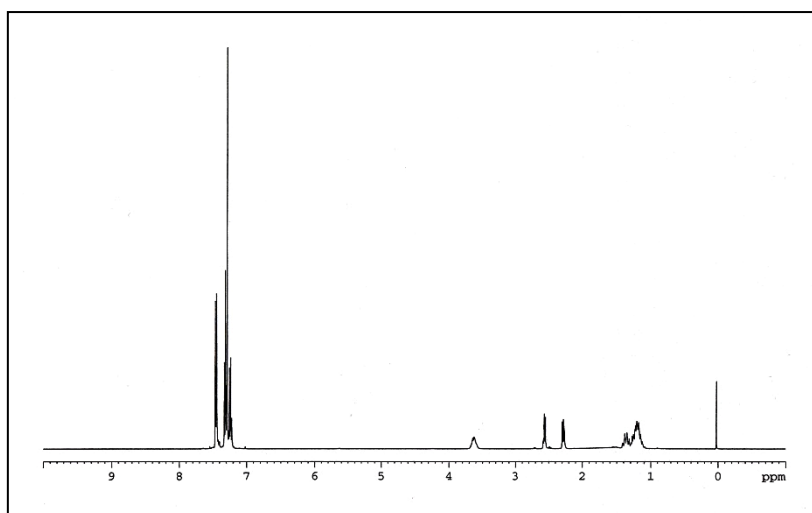**Figure S6.**  $^1\text{H}$ -NMR spectrum of compound **6**.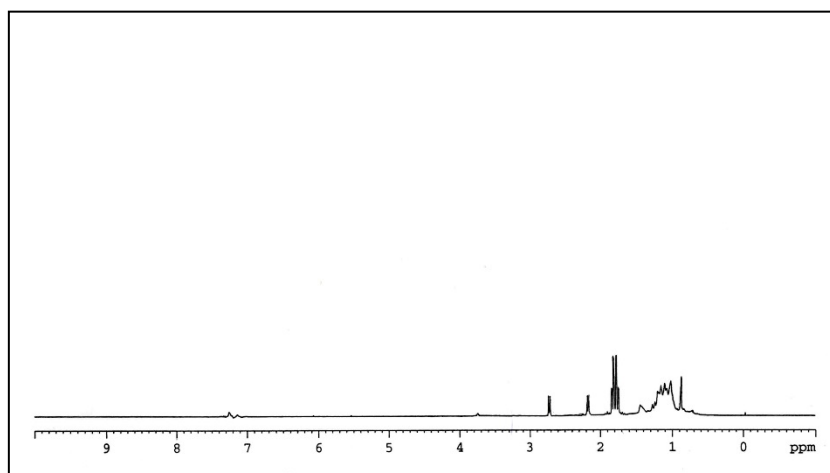

Supplement: Supplementary file 1 [file ijms-14-24670-s001.pdf]
